# Supplementary material
Source: PubMed Central journal article supplement (PMC3370884)
Supplement: supp_kwr393_kwr393_Web_Tables.pdf [file supp_kwr393_kwr393_Web_Tables.pdf]

**Web Table 1:** Comparison of Demographic Factors, Birth Weight, and Risk Factors for SGA Between the Original Cohort (N=1,518) and the Cytokine and Cognitive Testing- Follow-up Sample (N=369).

| Variables                             | Cytokine/IQ follow-up<br>N=369 |          | Original cohort<br>N=1518 |          | P value |
|---------------------------------------|--------------------------------|----------|---------------------------|----------|---------|
|                                       | mean                           | SD       | mean                      | SD       |         |
| Maternal age, years                   | 24.2                           | 4.3      | 24.5                      | 4.5      | 0.247   |
| Birth weight, grams                   | 3031                           | 649      | 3088 <sup>a</sup>         | 679      | 0.145   |
|                                       | <b>n</b>                       | <b>%</b> | <b>n</b>                  | <b>%</b> |         |
| Maternal race                         |                                |          |                           |          | 0.345   |
| Black                                 | 265                            | 71.8%    | 1052                      | 69.3%    |         |
| White                                 | 104                            | 28.2%    | 466                       | 30.7%    |         |
| Previous low birth weight (<2750 g)   | 155                            | 42.0%    | 585                       | 38.5%    | 0.221   |
| Previous stillbirth or neonatal death | 23                             | 6.2%     | 98                        | 6.5%     | 0.874   |
| > 2 spontaneous abortions             | 10                             | 2.7%     | 77                        | 5.1%     | 0.052   |
| Hx of phlebitis                       | 5                              | 1.4%     | 11                        | 0.7%     | 0.236   |
| Systolic BP > 140                     | 6                              | 1.6%     | 32                        | 2.1%     | 0.554   |
| Previous premature birth              | 66                             | 17.9%    | 240                       | 15.8%    | 0.332   |
| Height < 157 cm                       | 69                             | 18.7%    | 297                       | 19.6%    | 0.706   |
| Weight < 50 kg                        | 90                             | 24.4%    | 350                       | 23.1%    | 0.587   |
| Drank alcohol during pregnancy        | 118                            | 32.0%    | 484                       | 31.9%    | 0.975   |
| Smoked during pregnancy               | 155                            | 42.0%    | 718                       | 47.3%    | 0.067   |
| Late care > 26 weeks gestation        | 14                             | 3.8%     | 61                        | 4.0%     | 0.843   |

<sup>a</sup>Birth weight based on n=1491

**Web Table 2.** Adjusted<sup>a</sup> Odds Ratios for Low (scores <70) Verbal and Performance Intelligence Quotient (VIQ, PIQ) (vs. reference:  $\geq 70$ ), and Adjusted<sup>a</sup> Linear Regression Coefficients for VIQ and PIQ as Continuous Variables at Age 5 Years in Relation to Cord Serum Cytokine Levels (log, pg/mL), Infant Growth Project, Jefferson County, Alabama, 1985-1988 ( $n = 369$ ).

|                                | VIQ <70 |            | PIQ <70      |                   | VIQ     |             | PIQ     |             |
|--------------------------------|---------|------------|--------------|-------------------|---------|-------------|---------|-------------|
|                                | OR      | 95% CI     | OR           | 95% CI            | $\beta$ | 95% CI      | $\beta$ | 95% CI      |
| <b>IFN-<math>\gamma</math></b> | 1.04    | 0.74, 1.45 | <b>0.68*</b> | <b>0.46, 0.99</b> | 0.43    | -0.81, 1.67 | 0.80    | -0.68, 2.27 |
| <b>TNF-<math>\alpha</math></b> | 1.01    | 0.53, 1.93 | 0.88         | 0.45, 1.71        | 0.32    | -2.08, 2.72 | -1.02   | -3.88, 1.83 |
| <b>IL-12p70</b>                | 0.73    | 0.39, 1.38 | <b>0.43*</b> | <b>0.21, 0.88</b> | 1.59    | -0.71, 3.89 | 1.97    | -0.75, 4.70 |
| <b>IL-10</b>                   | 0.86    | 0.56, 1.32 | 0.92         | 0.60, 1.42        | 0.81    | -0.69, 2.31 | 0.31    | -1.49, 2.10 |
| <b>IL-4</b>                    | 0.95    | 0.68, 1.32 | 0.71         | 0.49, 1.02        | 0.63    | -0.59, 1.85 | 1.40    | -0.03, 2.82 |

\*  $P$  value <0.05 in logistic regression reference group:  $\geq 70$ .

<sup>a</sup> Adjusted model VIQ and PIQ: Adjusted for gender, race; VIQ is additionally adjusted for smoking in pregnancy (any).

**Web Table 3.** Adjusted<sup>a</sup> Odds Ratios for Low (scores <70) Verbal and Performance Intelligence Quotient (VIQ, PIQ) (vs. reference:  $\geq 70$ ), at Age 5 Years in Relation to Log Cytokine Concentrations by Preterm Birth status, Infant Growth Project, Jefferson County, Alabama, 1985-1988 ( $n = 369$ ).

|                                | Preterm birth<br>N= 72 |                   |        |             | Term birth<br>N=297 |            |              |                   |        |
|--------------------------------|------------------------|-------------------|--------|-------------|---------------------|------------|--------------|-------------------|--------|
|                                | VIQ <70                | OR                | 95% CI | PIQ <70     | OR                  | 95% CI     | VIQ <70      | OR                | 95% CI |
| <b>IFN-<math>\gamma</math></b> | 1.04                   | 0.50, 2.16        | 0.62   | 0.20, 1.93  | 1.03                | 0.71, 1.51 | 0.72         | 0.48, 1.08        |        |
| <b>TNF-<math>\alpha</math></b> | <b>0.11*</b>           | <b>0.02, 0.96</b> | 0.08   | 0.003, 2.11 | 1.34                | 0.67, 2.70 | 1.15         | 0.58, 2.29        |        |
| <b>IL-12p70</b>                | 0.48                   | 0.11, 1.98        | 0.88   | 0.11, 7.02  | 0.82                | 0.40, 1.66 | <b>0.41*</b> | <b>0.19, 0.89</b> |        |
| <b>IL-10</b>                   | 0.52                   | 0.17, 1.57        | 1.44   | 0.38, 5.43  | 0.95                | 0.60, 1.50 | 0.93         | 0.59, 1.46        |        |
| <b>IL-4</b>                    | 0.90                   | 0.39, 2.07        | 0.91   | 0.26, 3.18  | 0.95                | 0.66, 1.36 | 0.70         | 0.49, 1.03        |        |

\*  $P$  value <0.05 in logistic regression model, reference group:  $\geq 70$ .

<sup>a</sup>Model adjusted for gender, race; VIQ is additionally adjusted for smoking in pregnancy (any).

**Web Table 4.** Adjusted<sup>a</sup> Odds Ratios for Low (scores <70) Verbal and Performance Intelligence Quotient (VIQ, PIQ) (vs. reference:  $\geq 70$ ), at Age 5 Years in Relation to Log Cytokine Concentrations by Small-for-Gestational-Age status, Infant Growth Project, Jefferson County, Alabama, 1985-1988 ( $n = 369$ ).

|                                | SGA birth<br>N= 75      |                      |            |                      | non-SGA birth<br>N=294 |                      |                         |                      |
|--------------------------------|-------------------------|----------------------|------------|----------------------|------------------------|----------------------|-------------------------|----------------------|
|                                | VIQ <70                 | 95% CI               | PIQ <70    | 95% CI               | VIQ <70                | 95% CI               | PIQ <70                 | 95% CI               |
| <b>IFN-<math>\gamma</math></b> | OR<br>0.90              | 95% CI<br>0.47, 1.73 | OR<br>0.67 | 95% CI<br>0.34, 1.32 | OR<br>1.11             | 95% CI<br>0.75, 1.67 | OR<br>0.72              | 95% CI<br>0.45, 1.15 |
| <b>TNF-<math>\alpha</math></b> | <b>3.87<sup>b</sup></b> | <b>0.98, 15.3</b>    | 2.17       | 0.69, 6.85           | 0.52                   | 0.23, 1.17           | 0.50                    | 0.22, 1.16           |
| <b>IL-12p70</b>                | 1.09                    | 0.35, 3.36           | 0.76       | 0.25, 2.33           | 0.61                   | 0.28, 1.34           | <b>0.32<sup>*</sup></b> | <b>0.13, 0.81</b>    |
| <b>IL-10</b>                   | 1.22                    | 0.67, 2.20           | 1.20       | 0.68, 2.12           | 0.65                   | 0.35, 1.21           | 0.74                    | 0.39, 1.39           |
| <b>IL-4</b>                    | 1.0                     | 0.48, 2.07           | 0.92       | 0.46, 1.84           | 0.96                   | 0.65, 1.41           | 0.67                    | 0.43, 1.05           |

\*  $P$  value <0.05; <sup>b</sup>  $P$  value =0.053 in logistic regression model reference group:  $\geq 70$ .

<sup>a</sup> Model adjusted gender, race; VIQ is additionally adjusted for smoking in pregnancy (any).
